# Supplementary material for: Transporter engineering for improved tolerance against alkane biofuels in Saccharomyces cerevisiae
Source: PubMed Central journal article supplement (PMC3598725; doi:10.1186/1754-6834-6-21), 2013-02-13

**Table S1. Primers used in this study. Restriction sites are bold.**

| Primer name    | Primer sequence from 5' to 3'                                           |
|----------------|-------------------------------------------------------------------------|
| ABC2-F1        | ACCCA <b>AAGCTT</b> TAAAAAATGTCTCAAACACCTCCAGACTACACTGGTCTGG            |
| ABC2-R1        | CATCTCGGGGGACAC/CCTGATAATTCCATT                                         |
| ABC2-F2        | AATGGAATTATCAGG/GTGTCCCCCGAGATG                                         |
| ABC2-R2        | ATAAGAAT <b>GCGGCCGC</b> CTAATGGTGATGGTGATGATGAGCCTTCTGAGCCTTGGGA       |
| ABC3-F1        | ACGG <b>GGTACC</b> TAAAAAATGTCTGATCCTGTACCGATCACGCAGG                   |
| ABC3-R1        | GATTTTTCGGGGAATGC/CCTGATAATTCCATTCA                                     |
| ABC3-F2        | TGAATGGAATTATCAGG/GCATCCCCGAAAAATC                                      |
| ABC3-R2        | ACAT <b>GCATGC</b> CTAATGGTGATGGTGATGATGGGCCTTCTGCTTTCGAGACTTTTTG       |
| ABC2-E988Q-R1  | GACCGGAAGTAGGTTGATCCAGGAACAGC                                           |
| ABC2-E988Q-F2  | GCTGTTCCCTGGATCAACCTACTTCCGGTC                                          |
| ABC2-H1020A-R1 | GCAGAGGGCTGAGCAATGGTACACAGAATAGC                                        |
| ABC2-H1020A-F2 | GCTATTCTGTGTACCATTGCTCAGCCCTCTGC                                        |
| ABC3-E989Q-R1  | GGAAGTGGGTTGATCAAGGAACAGC                                               |
| ABC3-E989Q-F2  | GCTGTTCCCTTGATCAACCCACTTCC                                              |
| ABC3-H1021A-R1 | GCAGAGGGCTGAGCAATAGTACACAG                                              |
| ABC3-H1021A-F2 | CTGTGTA CTATTGCTCAGCCCTCTGC                                             |
| ABC2-EGFP-R2   | ATAAGAAT <b>GCGGCCGC</b> AGCCTTCTGAGCCTTGGACTTCTTG                      |
| ABC3-EGFP-R2   | ACAT <b>GCATGCA</b> ACATGGAT <b>GCGGCCGC</b> GGCCTTCTGCTTTCGAGACTTTTTGG |
| EGFP-F         | ATAAGAAT <b>GCGGCCGC</b> GATCGGTGACGGTGCTGGTTAA                         |
| EGFP-R         | ACAT <b>GCATGC</b> TTAATGGTGATGGTGATGATGTTTGTACAATTCATCCATACCATGG       |
| EGFP-control-F | ATAAGAAT <b>GCGGCCGC</b> TAAAAAATGTCTAAAGGTGAAGAATTATTCAGTGGTGTG        |
| ABC1-qPCR-F    | CGACGACAACAGCGTGAGGAACT                                                 |
| ABC1-qPCR-R    | CCACTGAGACACGGCGAAATCAGT                                                |
| ABC2-qPCR-F    | CCTGTTGTGTGGGCTGAGTCTCCT                                                |
| ABC2-qPCR-R    | TCGCTCGGTAGTGTTCTGCTGCAC                                                |
| ABC3-qPCR-F    | CGTGGCAGGCTTTCATGGGCT                                                   |
| ABC3-qPCR-R    | AAGAGGGCTCCTCGTTCGCCA                                                   |
| ABC4-qPCR-F    | GGCCACCAAAGAGCAGATGCCTG                                                 |
| ABC4-qPCR-R    | ACGTTACCGGGGCTCGTCCAA                                                   |
| Actin-F        | TCCAGGCCGTCTCTCCC                                                       |
| Actin-R        | GGCCAGCCATATCGAGTCGCA                                                   |

**Table S2. Specific growth rates under C10 and C11 alkane treatments**

|                         |                 | $\mu(\text{h}^{-1})$ |
|-------------------------|-----------------|----------------------|
| w/o alkane treatment    | empty plasmid   | 0.189±0.008          |
|                         | ABC2 expressing | 0.173±0.019          |
|                         | ABC3 expressing | 0.164±0.011          |
| with 0.5% C10 treatment | empty plasmid   | 0                    |
|                         | ABC2 expressing | 0.143±0.002          |
|                         | ABC3 expressing | 0.168±0.009          |
| with 20% C11 treatment  | empty plasmid   | 0                    |
|                         | ABC2 expressing | 0.204±0.021          |
|                         | ABC3 expressing | 0.178±0.015          |

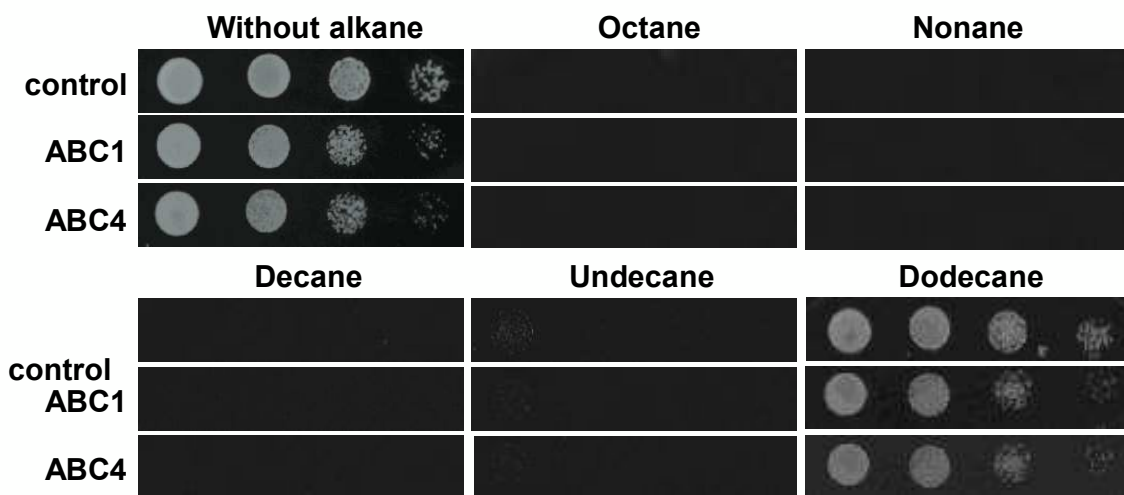

**Figure S1. Alkane susceptibility assay on agar plates.** Serial 10-fold dilutions (from left to right: non diluted,  $10^{-1}$ ,  $10^{-2}$ ,  $10^{-3}$ ) of cells were spotted on agar plates with alkanes (octane, nonane, decane, undecane and dodecane) as vapor phase.

**Figure S2. Topology model of ABC2 and ABC3.** To generate a topology model of ABC2 (A) and ABC3 (B), the TMHMMfix algorithm was used ([www.sbc.su.se/melen/TMHMMfix](http://www.sbc.su.se/melen/TMHMMfix)). The resulting model was visualized by the TOPO2 transmembrane protein display software ([www.sacs.ecsf.edu/TOPO2](http://www.sacs.ecsf.edu/TOPO2)). The Walker A motifs are shown in blue, the Walker B motifs are shown in green, and the C-loop are shown in orange. Residues that were mutated in this study are shown in red.

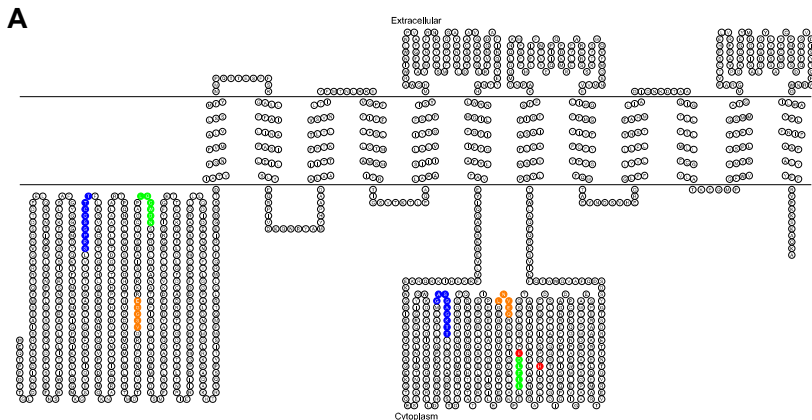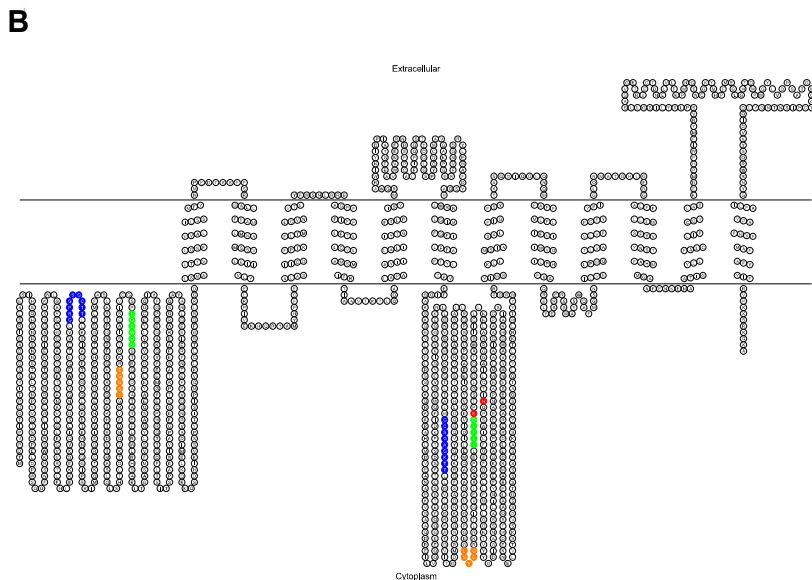

Supplement: 1754-6834-6-21-S1.pdf [file 1754-6834-6-21-S1.pdf]
